# Supplementary material for: Recruitment of monocytes primed to express heme oxygenase-1 ameliorates pathological lung inflammation in cystic fibrosis
Source: PubMed Central journal article supplement (PMC9166813; doi:10.1038/s12276-022-00770-8), 2022-05-17

1 **Title**

2 **Recruitment of monocytes primed to express heme oxygenase-1 ameliorates pathological lung**  
3 **inflammation in cystic fibrosis.**

4

5 **Short title: HO-1 expressing monocytes treat lung hyper-inflammation**

6

7 **Authors**

8

9 Caterina Di Pietro<sup>1</sup>, Hasan H Öz<sup>1</sup>, Ping-xia Zhang<sup>1,2</sup>, Ee-chun Cheng<sup>1</sup>, Valentino Martis<sup>1</sup>, Tracey L Bonfield<sup>3</sup>,  
10 Thomas J Kelley<sup>3</sup>, Ronald Jubin<sup>4</sup>, Abraham Abuchowski<sup>4</sup>, Diane S Krause<sup>2</sup>, Marie E Egan<sup>1,5</sup>, Thomas S Murray<sup>1</sup>  
11 and Emanuela M Bruscia<sup>1</sup> \*

12

13 **Affiliations**

14

15 <sup>1</sup>*Departments of Pediatrics, Yale University School of Medicine, New Haven CT, USA*

16 <sup>2</sup>*Laboratory Medicine and the Yale Stem Cell Center, Yale University School of Medicine, New Haven CT,*  
17 *USA*

18 <sup>3</sup>*Department of Genetics and Genome Sciences, Case Western Reserve University, Cleveland, Ohio;*

19 <sup>4</sup>*Prolong Pharmaceuticals, South Plainfield, NJ, USA.*

20 <sup>5</sup>*Cellular and Molecular Physiology, Yale University School of Medicine, New Haven CT, USA;*

21

22 \*Corresponding author. Email: [emanuela.bruscia@yale.edu](mailto:emanuela.bruscia@yale.edu)

23

24 **Competing interests:**

25 The authors declare the following competing financial interests: the Bruscia lab has been supported by a grant  
26 from Prolong Pharmaceuticals.

27

28

29 **Supplementary Figures:**

30 **1.** related to Figure 2: PP-007 induces HO-1 in macrophages via the synergistic activation of the MyD88 and  
31 PI3K/AKT pathways.

32 **2.** related to Figure 3: PP-007 allows a normal induction of HO-1 in CF MΦs.

33 **3.** related to Figure 4: Systemic delivery of PP-007 induces HO-1 expression in lung macrophages.

34 **4.** related to Figure 5: Systemic delivery of PP-007 reduces the inflammatory response in CF lungs.

35 **5.** related to Figure 5: Systemic delivery of PP-007 reduces inflammation in βENaC-Tg mice.

36 **6.** Related to Figure 5: Systemic delivery of PP-007 does not affect the inflammatory response in WT mice.

37 **7.** Related to Figure 5: PP-007 does not weaken the host defense against *P. aeruginosa*.

38 **Supplementary Table 1:** Genotypes of CF patients enrolled in this study.

39 **Supplementary Table 2:** List of mice used for in vivo LPS treatment.

40 **Supplementary Fig. 1 related to Fig. 2: PP-007 induces HO-1 in macrophages via the synergistic**  
 41 **activation of the MyD88 and PI3K/AKT pathways.**

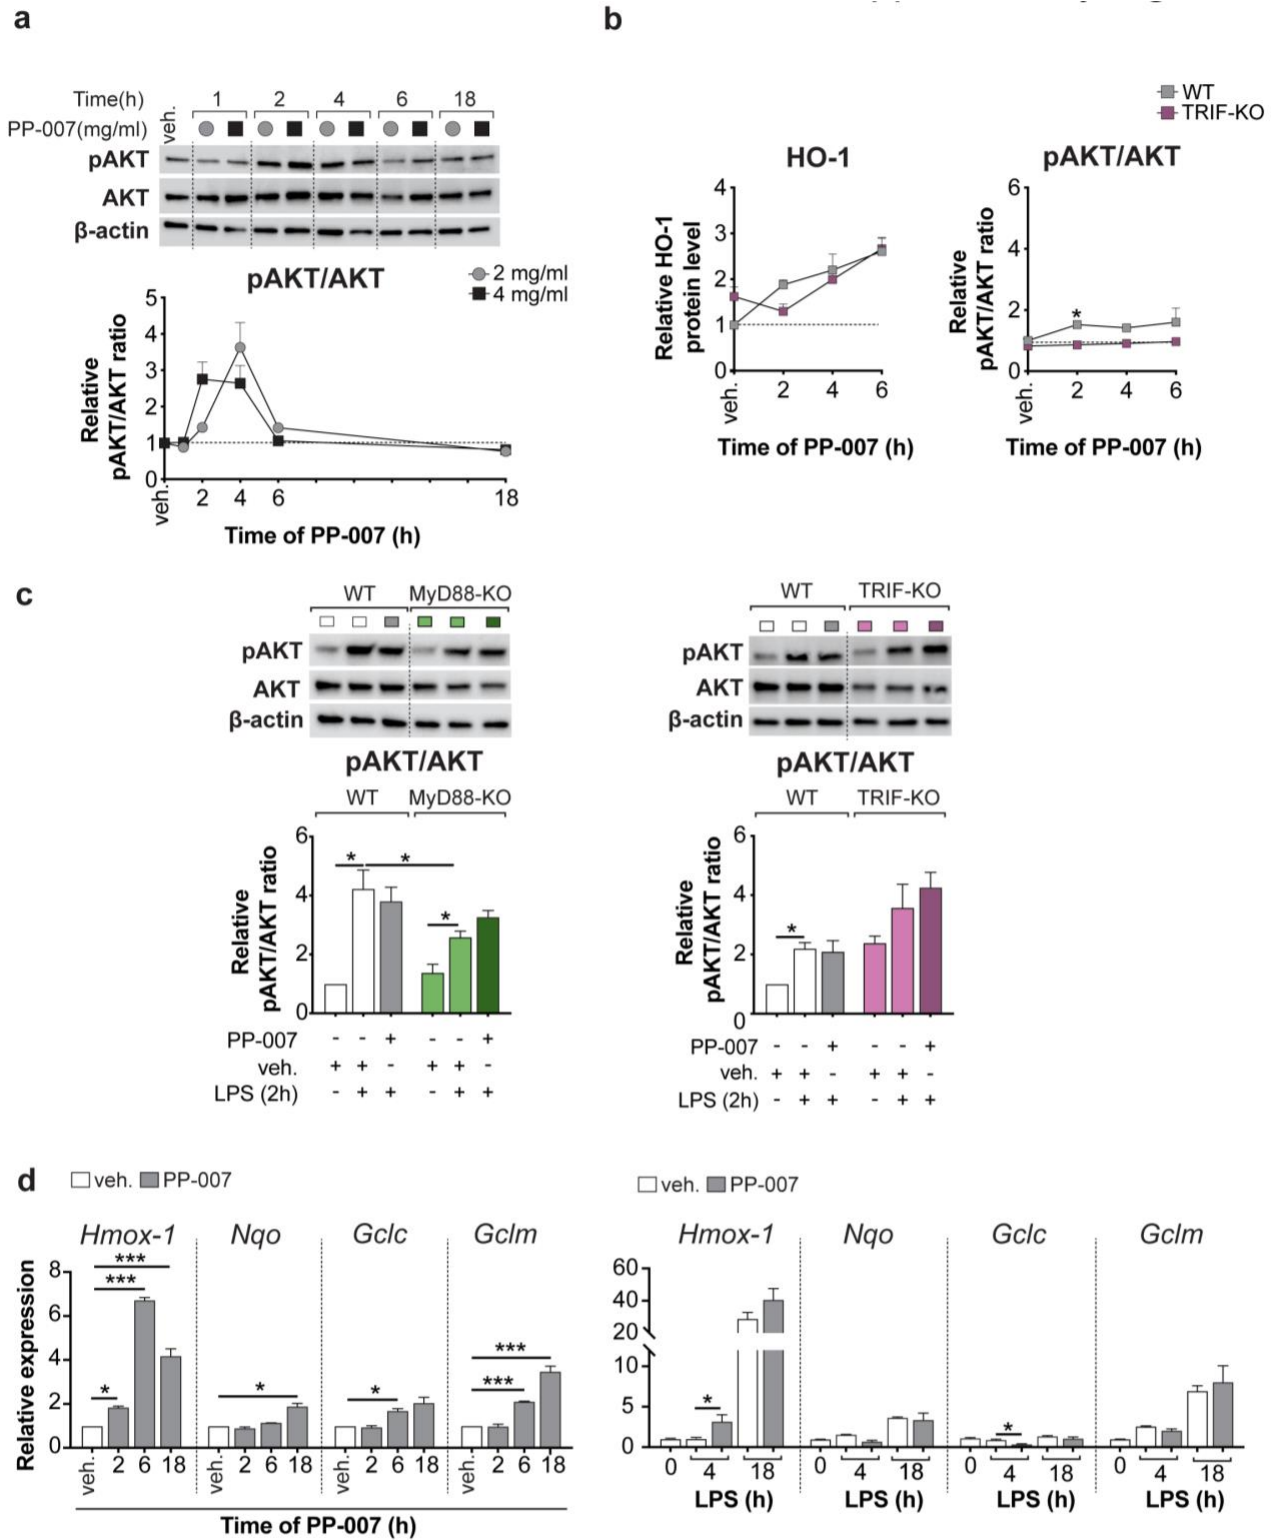

43 (a) Representative WB and densitometric analysis for pAKT and AKT in WT MΦs treated with 2 mg/ml or 4  
44 mg/ml of PP-007 for the time indicated. Data are represented as fold increase of PP-007-treated samples  
45 relative to vehicle-treated samples (Time 0) and are the results of two biological repeats. (b) Densitometric  
46 analysis for HO-1, pAKT, and AKT in WT and TRIF-KO MΦs treated with 2 mg/ml of PP-007 for the time  
47 indicated. Time 0 corresponds to the samples treated with vehicle. (c) Representative WB and densitometric  
48 analysis of pAKT and total AKT in WT and MyD88-KO (left panel) or TRIF-KO (right panel) pre-treated with  
49 vehicle or 2 mg/ml of PP-007 for 6 h, then challenged with PA-LPS for an additional 2 h. (d) qPCR for Nrf2-  
50 target genes (*Hmox-1*, *Nqo1*, *Gclc* and *Gclm*) in WT MΦs treated with 2 mg/ml of PP-007 for the time indicated  
51 (left) and following additional PA-LPS stimulation for 4h and 18 h started after 6 h of PP-007 pretreatment  
52 (right). Time 0 corresponds to the sample treated with vehicle and not treated with LPS. mRNA levels are  
53 normalized to 18S. For WB, band intensity is normalized for the corresponding β-Actin intensity, and the rate  
54 of AKT phosphorylation is shown as the ratio of phosphoprotein to total protein. Data are represented as fold  
55 increase relative to WT vehicle-treated samples. Data are represented as means ± SEM and, unless otherwise  
56 indicated, are the result of three biological repeats. Statistical analyses were conducted using a two-tailed  
57 unpaired Student's *t* test with unequal variance: \**P* ≤ 0.05, \*\**P* < 0.01, and \*\*\**P* < 0.001. In (b), \* symbols  
58 indicate a statistically significant difference between WT and TRIF-KO samples. Cropped blots are displayed,  
59 and full-length gels and blots are included in the **Supplementary Material**.

60

61 **Supplementary Fig. 2 related to Fig. 3: PP-007 allows a normal induction of HO-1 in CF MΦs.**

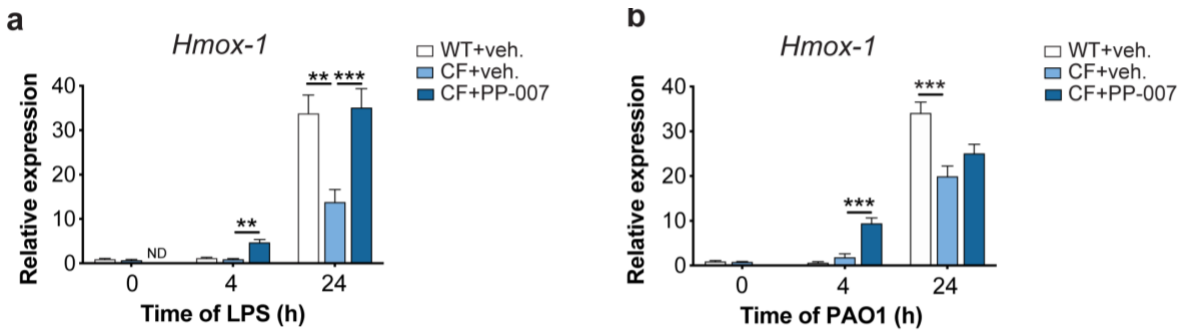

62

63 (a) qPCR for *Hmox-1* in CF MΦs pre-treated with vehicle or 2 mg/ml of PP-007 for 6 h, before the addition of  
64 PA-LPS or (b) live PAO1 for an additional 4 h and 18 h. WT MΦs pre-treated with vehicle were used as control.  
65 *Hmox-1* levels are normalized to 18S. Data are represented as fold increase relative to WT vehicle-treated  
66 samples without PA-LPS or PAO1. Data are represented as means ± SEM of three experimental repeats.  
67 Statistical analyses were conducted using a two-tailed unpaired Student's *t* test with unequal variance:  
68 \*\**p* < 0.01. ND: not determined

69

70 **Supplementary Fig. 3 related to Fig. 4: Systemic delivery of PP-007 induces HO-1 expression in lung**  
 71 **macrophages.**

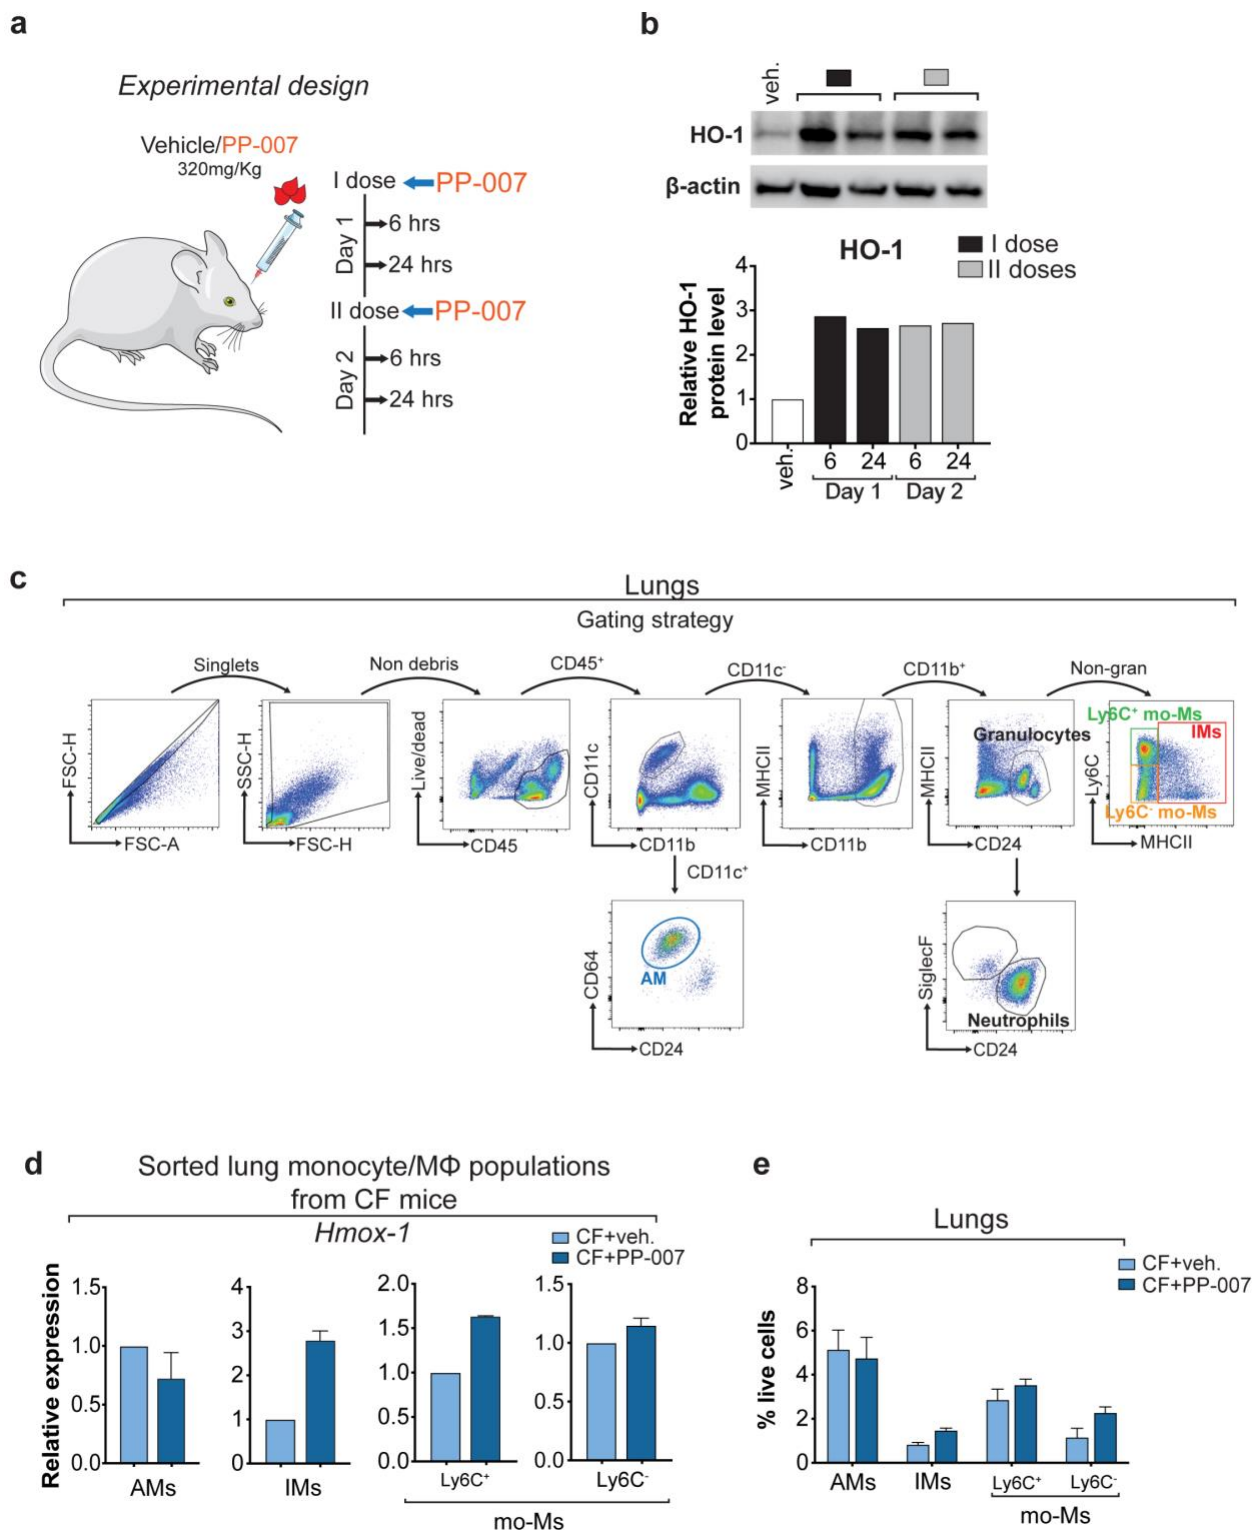

72

73

74 (a) Cartoon representing the experimental design: WT mice (1 mouse/ condition) received 1 or 2 doses of PP-007 (320 mg/kg) and were sacrificed 6 h or 24 h after each treatment. (b) Representative immunoblot and  
 75 densitometric analysis of HO-1 in lung lysates. Data are represented as fold increase of PP-007-treated sample  
 76 relative to vehicle-treated sample. (c) Sequential gating strategy used to identify monocyte/macrophages  
 77

78 population and neutrophils in the lung. After the exclusion of doublets and debris, cell populations were gated  
79 from viable CD45<sup>+</sup> cells: alveolar macrophages (AMs): CD11c<sup>+</sup>CD64<sup>+</sup>; neutrophils: CD11c<sup>-</sup>  
80 CD11b<sup>+</sup>CD24<sup>+</sup>Ly6G<sup>+</sup>; after exclusion of granulocytic cells: interstitial macrophages (IMs): CD11c<sup>-</sup>CD11b<sup>+</sup>MHC-  
81 II<sup>+</sup>; and monocyte-derived macrophages (mo-Ms): CD11c<sup>-</sup>CD11b<sup>+</sup>MHC-II<sup>-</sup>Ly6C<sup>+</sup> and CD11c<sup>-</sup>CD11b<sup>+</sup>MHC-II<sup>-</sup>  
82 Ly6C<sup>-</sup>. **(d)** qPCR for *Hmox-1* from monocyte/macrophages population sorted from lung of CF mice 24 h after  
83 PP-007 or vehicle treatment (n=2/group). **(e)** Percentage of monocyte/macrophages out of live cells in the lung  
84 of CF mice 24 h after PP-007 or vehicle treatment (n=3/group).

85

86 **Supplementary Fig. 4 related to Fig. 5: Systemic delivery of PP-007 reduces the inflammatory response**  
 87 **in CF lungs.**

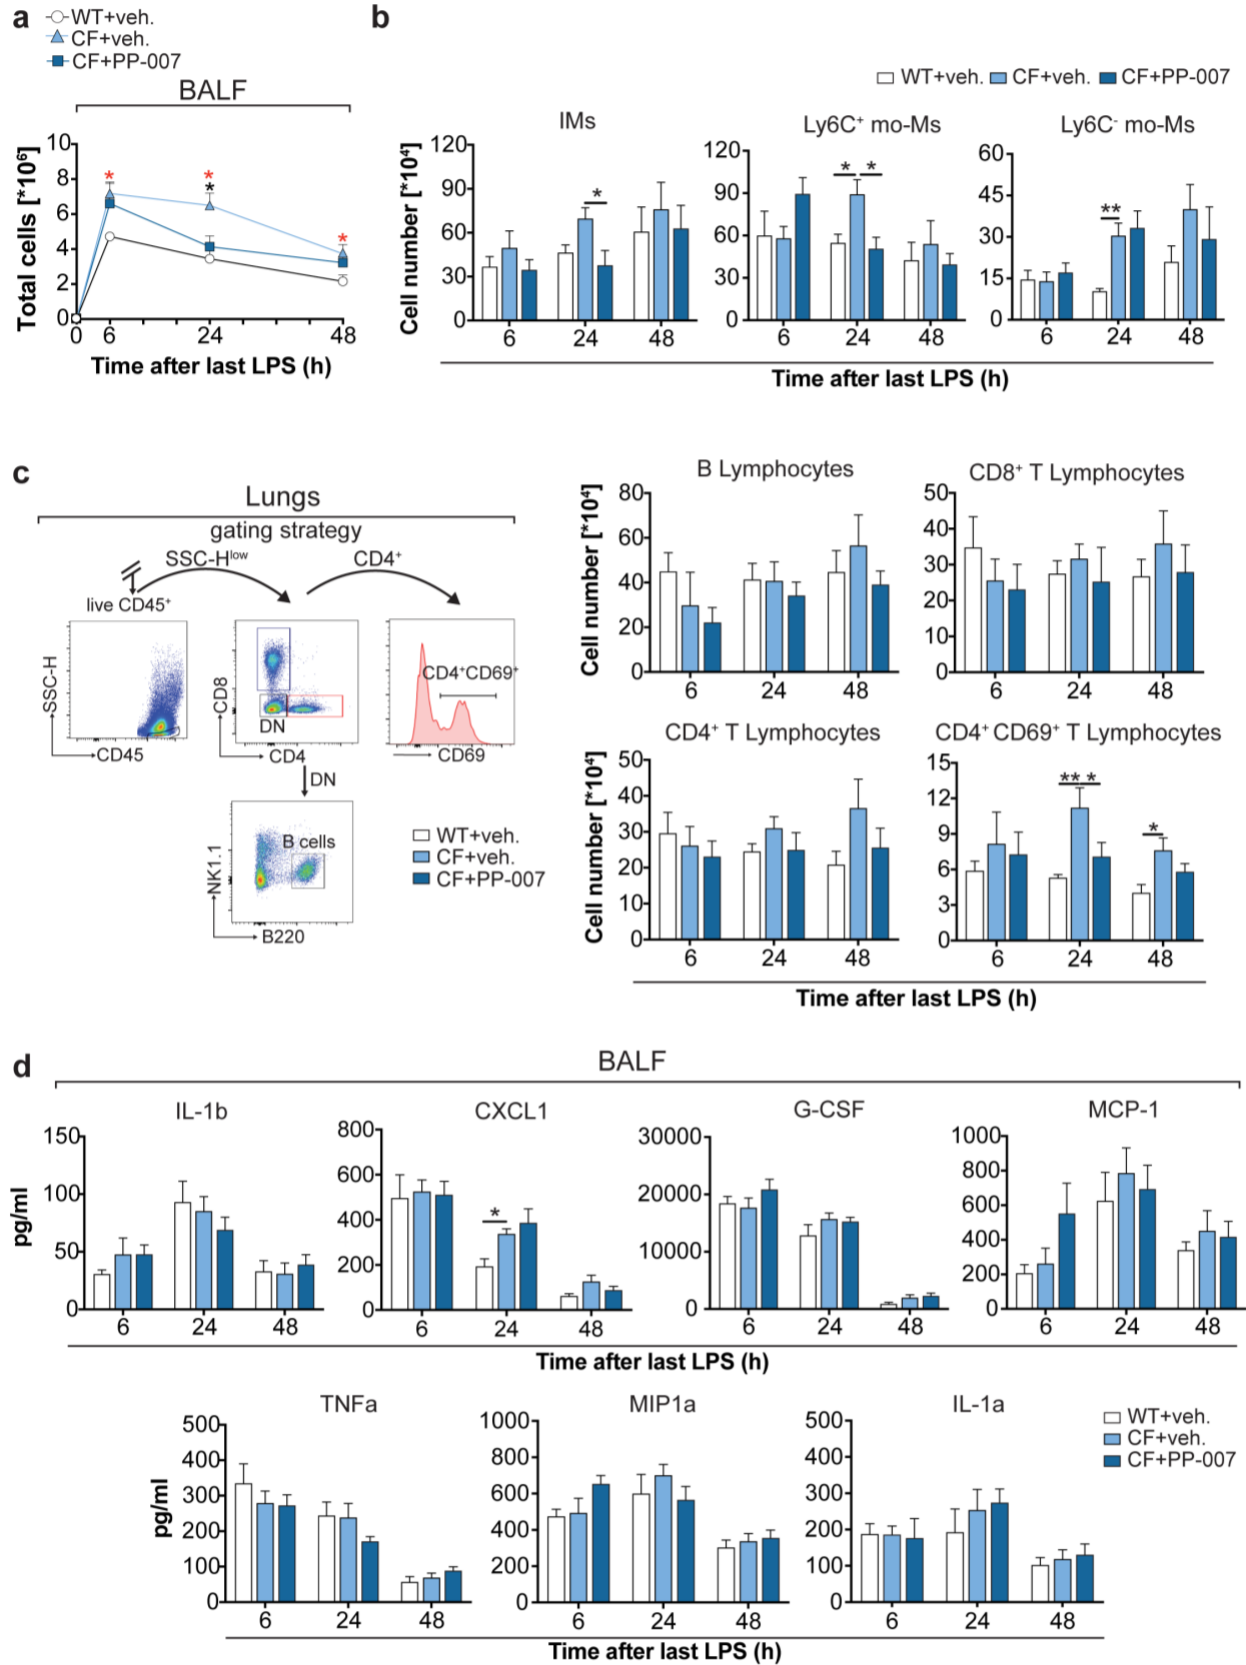

88  
 89 (a) Total cell counting in the bronchoalveolar lavage (BAL) fluid of WT and CF mice treated with vehicle and  
 90 CF mice treated with PP-007 at the time indicated. (b) Number of monocyte/macrophages in the lung tissues.



91 (c) Gating strategy (left) and number of B and T lymphocytes in the lung (right). After the exclusion of doublets  
92 and debris, cell populations were gated from viable CD45<sup>+</sup> cells. T lymphocytes were distinguished based on  
93 CD4 and CD8 markers, and CD4 cells were further analyzed for the expression of the activation marker CD69.  
94 B lymphocytes were gated as B220<sup>+</sup> from DN population (CD4<sup>-</sup>CD8<sup>-</sup>). For **b** and **c** the percentage of cells in  
95 the live/singlets gate was then multiplied by the number of live cells to obtain an absolute live-cell count. AMs:  
96 alveolar macrophages; IMs: Interstitial macrophages; mo-Ms: monocyte-derived macrophages. (d) Cytokine  
97 concentration in BALF. Graphs show means  $\pm$  SEM. In **a** Red symbol (\*) indicates a statistically significant  
98 difference between vehicle-treated WT and CF groups. Black symbol (\*) indicates a statistically significant  
99 difference between vehicle-treated CF group and PP-007-treated CF group. A detailed list of mice used for  
100 each experiment is included in **Supplementary Table 2**. Statistical analyses were conducted using a two-  
101 tailed unpaired Student's *t* test with unequal variance: \**P*  $\leq$  0.05 and \*\**P* < 0.01.  
102

103 **Supplementary Fig. 5 related to Fig. 5: Systemic delivery of PP-007 reduces inflammation in  $\beta$ ENaC-Tg**  
 104 **mice.**

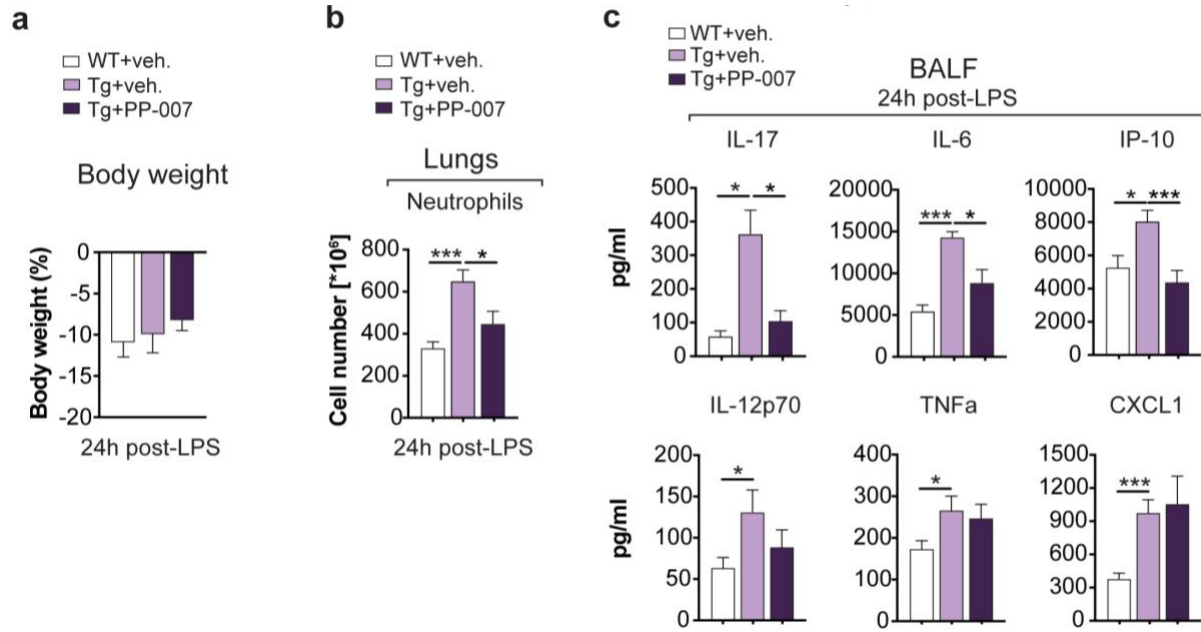

105  
 106  $\beta$ ENaC-Tg (Tg) mice were pre-treated with vehicle (n=7) or PP-007 (n=10), then nebulized with PA-LPS as  
 107 depicted in **Fig. 5a**.  $\beta$ ENaC-Tg WT mice (WT; n=9-11 mice) were pre-treated with vehicle and used as control.  
 108 Mice were analyzed 24 h after the last LPS nebulization. **(a)** Weight loss as percentage of body weight. **(b)**  
 109 Number of neutrophils in lung parenchyma assessed by flow cytometry. **(c)** Cytokine concentration in BALF.  
 110 Graphs show means  $\pm$  SEM and are a combination of three independent experiments. Statistical analyses  
 111 were conducted using a two-tailed unpaired Student's *t* test with unequal variance: \* $p < 0.05$ , \*\* $p < 0.01$ , and  
 112 \*\*\* $p < 0.001$ .

113

114 **Supplementary Fig. 6 Related to Fig. 5: Systemic delivery of PP-007 does not affect the inflammatory**  
 115 **response in WT mice.**

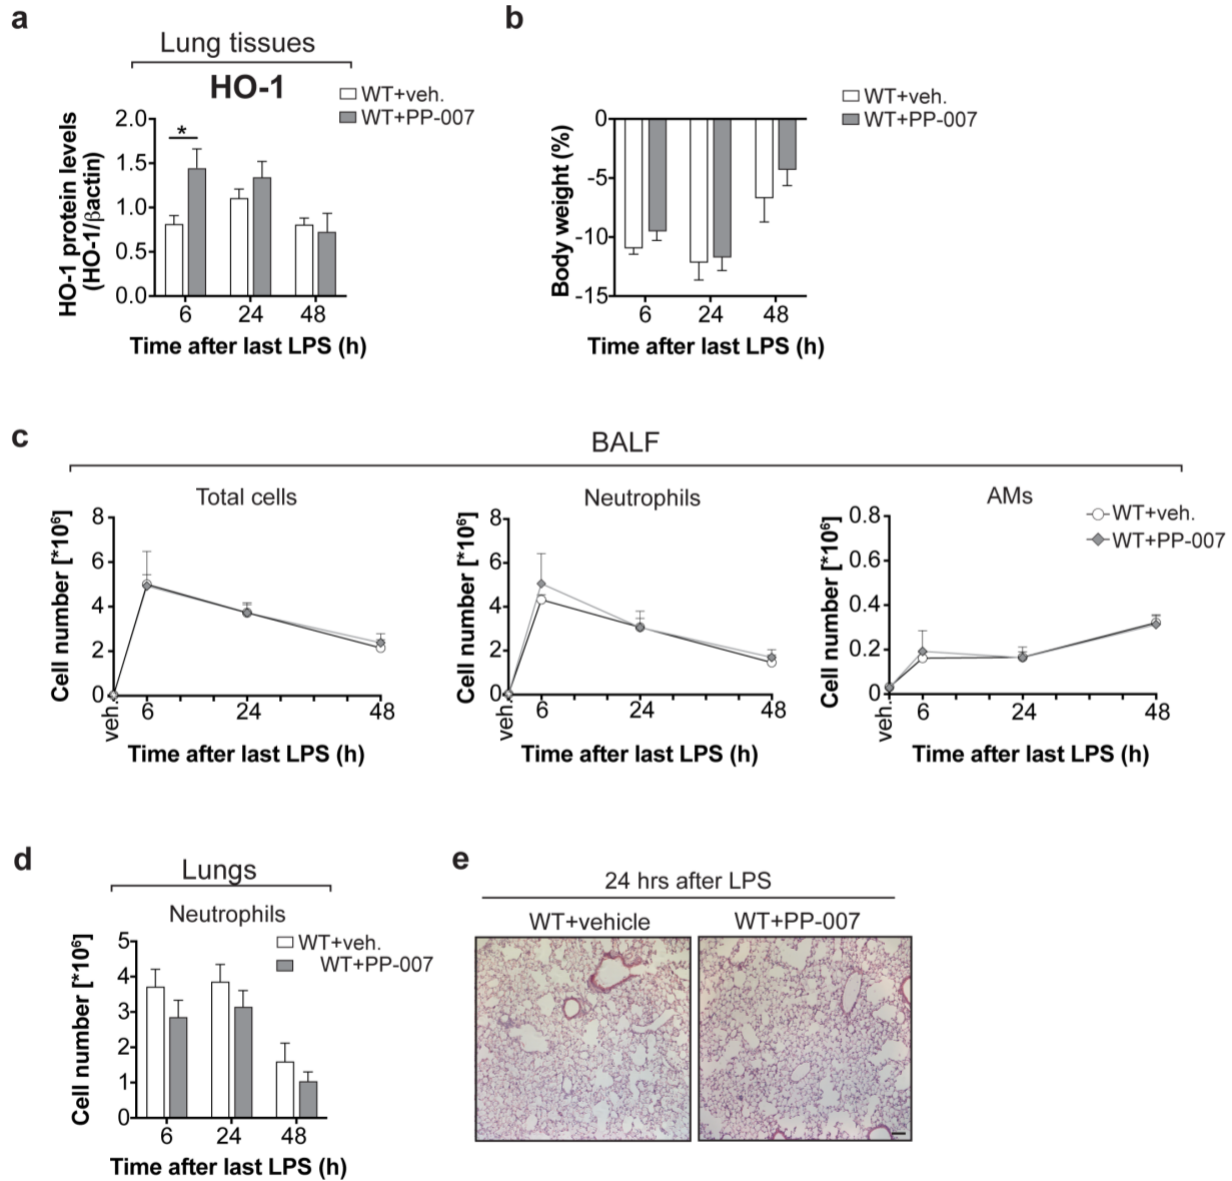

116  
 117 WT mice were pre-treated with vehicle or PP-007, then nebulized with PA-LPS as depicted in Fig. 5a. **(a)**  
 118 Densitometric analysis of HO-1 in lung lysates. Intensities of HO-1 immunoreactive signals were measured  
 119 and normalized to  $\beta$ -Actin. **(b)** Weight loss as percentage of body weight. **(c)** Total and differential cell counting  
 120 in the BALF. **(d)** Number of neutrophils in lung parenchyma assessed by flow cytometry using sequential gating  
 121 strategy shown in **Supplementary Fig. 3**. The percentage of cells in the live/singlets gate was then multiplied  
 122 by the number of live cells to obtain an absolute live-cell count. **(e)** Representative hematoxylin/eosin staining  
 123 in paraffin-embedded lung tissues at 24 h from the last LPS. Magnification: x10; Scale bar: 100  $\mu$ m. Graphs  
 124 show means  $\pm$  SEM. A detailed list of mice used for each experiment is included in **Supplementary Table 2**.  
 125 Statistical analyses were conducted using a two-tailed unpaired Student's *t* test with unequal variance: \**P* <  
 126 0.05.  
 127

128 **Supplementary Fig. 7 Related to Fig. 5: PP-007 does not weaken the host defense against *P.***  
 129 ***aeruginosa*.**

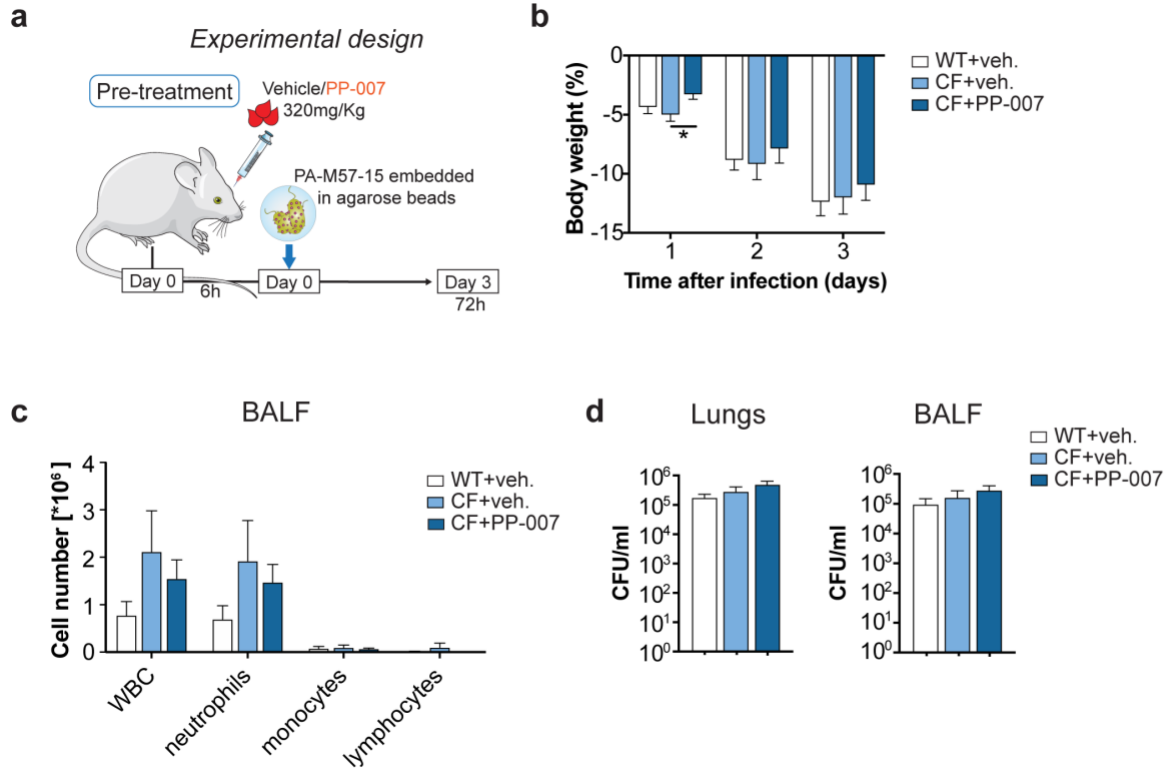

130  
 131 (a) Schematic cartoon showing the treatment: CF mice were injected I.V. with 1 dose of PP-007 (320 mg/kg)  
 132 (n=10) or vehicle (n=6), and WT mice (n=6) were injected with vehicle and used as control. At 6 h after injection,  
 133 PA-M57-15 was instilled into the right mainstem bronchus at a sub-lethal dose of 10<sup>5</sup> viable cfu/ml embedded  
 134 in agarose beads. Mice were sacrificed 3 days post-infection (72 h). (b) Weight loss as percentage of body  
 135 weight. (c) Total and differential cell counting in the BALF. (d) PA CFUs from the lung and BALF. Statistical  
 136 analyses were conducted using a two-tailed unpaired Student's *t* test with unequal variance: \**p* < 0.05  
 137

138 **Supplementary Table 1:** Genotypes of CF patients enrolled in this study.

| Patient ID | Mutation                                             |
|------------|------------------------------------------------------|
| 1          | F508del/unknown                                      |
| 2          | F508del/F508del                                      |
| 3          | F508del/F508del                                      |
| 4          | F508del/F508del                                      |
| 5          | F508del/M470V                                        |
| 6          | F508del/unknown                                      |
| 7          | F508del/F508del                                      |
| 8          | F508del/W846X                                        |
| 9          | F508del/F508del                                      |
| 10         | F508del/F508del                                      |
| 11         | F508del/F508del                                      |
| 12         | F508del/F508del                                      |
| 13         | F508del/F508del                                      |
| 14         | F508del/F508del                                      |
| 15         | 3849+10KBC>T/2215ΔG                                  |
| 16         | G551D/M470V                                          |
| 17         | H609R/H609R                                          |
| 18         | 1507Δ/D1270N                                         |
| 19         | 61717G>A/N1303K                                      |
| 20         | 3849+10KBC>T/2215ΔG                                  |
| 21         | ΔF508/A613T/M470V/seq change detected: polyT 7T & 9T |

139  
140

**Supplementary Table 2: List of mice used for in vivo LPS treatment.**

| Mice used for in vivo LPS treatment |     |           |          |        |    |        |                   |      |         | Mice used for in vivo LPS treatment |     |           |          |        |    |        |                   |      |         |
|-------------------------------------|-----|-----------|----------|--------|----|--------|-------------------|------|---------|-------------------------------------|-----|-----------|----------|--------|----|--------|-------------------|------|---------|
|                                     | Sex | Age (wks) | Time (h) | Treat. | WB | weight | BAL cell counting | Flow | Luminex |                                     | Sex | Age (wks) | Time (h) | Treat. | WB | weight | BAL cell counting | Flow | Luminex |
| WT                                  | f   | 20        | 6        | Veh.   |    |        |                   |      | X       | WT                                  | f   | 16.0      | 6        | PP-007 |    | X      |                   |      | ND      |
| WT                                  | m   | 13        | 6        | Veh.   | X  | X      | X                 | X    | X       | WT                                  | f   | 20.0      | 6        | PP-007 | X  | X      |                   |      | ND      |
| WT                                  | f   | 13        | 6        | Veh.   | X  | X      | X                 | X    | X       | WT                                  | f   | 24.0      | 6        | PP-007 | X  | X      | X                 | X    | ND      |
| WT                                  | f   | 24        | 6        | Veh.   | X  | X      | X                 | X    | X       | WT                                  | m   | 20        | 6        | PP-007 | X  | X      | X                 | X    | ND      |
| WT                                  | f   | 24        | 6        | Veh.   | X  | X      | X                 | X    | X       | WT                                  | m   | 24        | 6        | PP-008 | X  | X      | X                 | X    | ND      |
| WT                                  | m   | 20        | 6        | Veh.   | X  | X      | X                 | X    | X       | WT                                  | m   | 22        | 6        | PP-009 | X  | X      | X                 | X    | ND      |
| WT                                  | f   | 20        | 6        | Veh.   | X  | X      | X                 | X    | X       |                                     |     |           |          |        |    |        |                   |      |         |
| WT                                  | m   | 15        | 6        | Veh.   | X  | X      | X                 | X    | X       |                                     |     |           |          |        |    |        |                   |      |         |
| Number                              |     |           |          |        | 7  | 7      | 7                 | 7    | 8       | Number                              |     |           |          |        | 5  | 6      | 4                 | 4    |         |
| WT                                  | f   | 16        | 24       | Veh.   | X  |        |                   |      |         | WT                                  | f   | 16        | 24       | PP-007 | X  |        | X                 |      | ND      |
| WT                                  | m   | 25        | 24       | Veh.   | X  |        |                   |      |         | WT                                  | m   | 28        | 24       | PP-007 | X  | X      | X                 |      | ND      |
| WT                                  | f   | 12        | 24       | Veh.   | X  |        |                   |      |         | WT                                  | m   | 20        | 24       | PP-007 | X  | X      | X                 | X    | ND      |
| WT                                  | m   | 12        | 24       | Veh.   | X  | X      |                   |      |         | WT                                  | f   | 20        | 24       | PP-007 | X  | X      | X                 | X    | ND      |
| WT                                  | f   | 24        | 24       | Veh.   | X  | X      |                   |      |         | WT                                  | f   | 20        | 24       | PP-007 | X  | X      | X                 | X    | ND      |
| WT                                  | f   | 24        | 24       | Veh.   | X  | X      |                   | X    | X       | WT                                  | f   | 16        | 24       | PP-007 | X  | X      | X                 | X    | ND      |
| WT                                  | f   | 20        | 24       | Veh.   | X  | X      |                   | X    | X       | WT                                  | f   | 16        | 24       | PP-007 | X  | X      | X                 | X    | ND      |
| WT                                  | f   | 16        | 24       | Veh.   | X  | X      |                   | X    | X       | WT                                  | f   | 12.0      | 24       | PP-008 |    |        | X                 | X    | ND      |
| WT                                  | f   | 16        | 24       | Veh.   | X  | X      | X                 | X    | X       | WT                                  | m   | 12.0      | 24       | PP-009 |    |        | X                 | X    | ND      |
| WT                                  | f   | 16        | 24       | Veh.   | X  | X      | X                 | X    | X       |                                     |     |           |          |        |    |        |                   |      |         |
| WT                                  | f   | 16        | 24       | Veh.   | X  | X      | X                 | X    | X       |                                     |     |           |          |        |    |        |                   |      |         |
| WT                                  | f   | 16        | 24       | Veh.   | X  | X      | X                 | X    | X       |                                     |     |           |          |        |    |        |                   |      |         |
| WT                                  | m   | 25        | 24       | Veh.   | X  | X      | X                 | X    | X       | Number                              |     |           |          |        | 7  | 6      | 9                 | 7    |         |
| WT                                  | f   | 20        | 24       | Veh.   | X  | X      | X                 | X    | X       |                                     |     |           |          |        |    |        |                   |      |         |
| WT                                  | f   | 24        | 48       | Veh.   | X  | X      | X                 | X    | X       | WT                                  | f   | 24        | 48       | PP-007 | X  | X      | X                 | X    | ND      |
| WT                                  | m   | 24        | 48       | Veh.   | X  | X      | X                 | X    | X       | WT                                  | f   | 24.0      | 48       | PP-007 | X  | X      | X                 | X    | ND      |
| WT                                  | f   | 16        | 48       | Veh.   | X  | X      | X                 | X    | X       | WT                                  | f   | 16        | 48       | PP-007 | X  | X      | X                 | X    | ND      |
| WT                                  | f   | 14        | 48       | Veh.   | X  | X      | X                 | X    | X       | WT                                  | f   | 15        | 48       | PP-007 | X  | X      | X                 | X    | ND      |
| WT                                  | f   | 24        | 48       | Veh.   | X  | X      | X                 | X    | X       | WT                                  | f   | 16        | 48       | PP-007 | X  | X      | X                 | X    | ND      |
| WT                                  | m   | 24        | 48       | Veh.   | X  | X      | X                 | X    | X       | WT                                  | f   | 10.0      | 48       | PP-007 | X  | X      | X                 | X    | ND      |
| WT                                  | f   | 12        | 48       | Veh.   | X  | X      | X                 | X    | X       |                                     |     |           |          |        |    |        |                   |      |         |
| WT                                  | f   | 12        | 48       | Veh.   | X  | X      | X                 | X    | X       | Number                              |     |           |          |        | 6  | 6      | 6                 | 6    |         |
| Number                              |     |           |          |        | 7  | 8      | 8                 | 8    | 7       |                                     |     |           |          |        |    |        |                   |      |         |
|                                     |     |           |          |        |    |        |                   |      |         |                                     |     |           |          |        |    |        |                   |      |         |
| CF                                  | f   | 25        | 6        | Veh.   | X  |        |                   |      | X       | CF                                  | m   | 26        | 6        | PP-007 |    | X      |                   |      |         |
| CF                                  | f   | 20        | 6        | Veh.   | X  | X      | X                 | X    | X       | CF                                  | f   | 20        | 6        | PP-008 |    | X      |                   | X    | X       |
| CF                                  | f   | 13        | 6        | Veh.   | X  | X      | X                 | X    | X       | CF                                  | m   | 20        | 6        | PP-009 |    | X      |                   | X    | X       |
| CF                                  | f   | 21        | 6        | Veh.   | X  | X      | X                 | X    | X       | CF                                  | f   | 12        | 6        | PP-010 |    | X      |                   | X    | X       |
| CF                                  | f   | 13        | 6        | Veh.   | X  | X      | X                 | X    | X       | CF                                  | f   | 12        | 6        | PP-011 | X  | X      | X                 | X    | X       |
| CF                                  | m   | 13        | 6        | Veh.   | X  | X      | X                 | X    | X       | CF                                  | m   | 14        | 6        | PP-012 | X  | X      | X                 | X    | X       |
| CF                                  | m   | 13        | 6        | Veh.   | X  | X      | X                 | X    | X       | CF                                  | f   | 14        | 6        | PP-013 | X  | X      | X                 | X    | X       |
| Number                              |     |           |          |        | 7  | 6      | 6                 | 6    | 7       | CF                                  | f   | 14        | 6        | PP-014 | X  | X      | X                 | X    | X       |
|                                     |     |           |          |        |    |        |                   |      |         | CF                                  | f   | 14        | 6        | PP-015 | X  | X      | X                 | X    | X       |
|                                     |     |           |          |        |    |        |                   |      |         | Number                              |     |           |          |        | 5  | 9      | 5                 | 8    | 8       |
|                                     |     |           |          |        |    |        |                   |      |         |                                     |     |           |          |        |    |        |                   |      |         |
| CF                                  | f   | 25        | 24       | Veh.   | X  | X      |                   |      |         | CF                                  | f   | 20        | 24       | PP-007 |    | X      |                   |      |         |
| CF                                  | m   | 16        | 24       | Veh.   | X  | X      |                   |      |         | CF                                  | f   | 30        | 24       | PP-007 |    | X      |                   |      |         |
| CF                                  | m   | 16        | 24       | Veh.   | X  | X      |                   | X    |         | CF                                  | m   | 24        | 24       | PP-007 |    | X      |                   |      |         |
| CF                                  | f   | 20        | 24       | Veh.   | X  | X      |                   | X    |         | CF                                  | f   | 24        | 24       | PP-007 |    | X      |                   |      |         |
| CF                                  | f   | 25        | 24       | Veh.   | X  | X      |                   | X    | X       | CF                                  | f   | 12        | 24       | PP-007 |    | X      | X                 |      |         |
| CF                                  | f   | 10        | 24       | Veh.   | X  | X      | X                 | X    | X       | CF                                  | f   | 12        | 24       | PP-007 | X  | X      | X                 |      | X       |
| CF                                  | f   | 16        | 24       | Veh.   | X  | X      | X                 | X    | X       | CF                                  | f   | 12        | 24       | PP-007 | X  | X      | X                 | X    | X       |
| CF                                  | m   | 20        | 24       | Veh.   | X  | X      | X                 | X    | X       | CF                                  | f   | 12        | 24       | PP-007 | X  | X      | X                 | X    | X       |
| CF                                  | m   | 20        | 24       | Veh.   | X  | X      | X                 | X    | X       | CF                                  | m   | 16        | 25       | PP-008 | X  | X      | X                 | X    | X       |
| CF                                  | m   | 12        | 24       | Veh.   | X  | X      | X                 | X    | X       | CF                                  | f   | 16        | 26       | PP-009 | X  | X      | X                 | X    | X       |
| CF                                  | m   | 12        | 24       | Veh.   | X  | X      | X                 | X    | X       | CF                                  | f   | 20        | 27       | PP-010 | X  | X      | X                 | X    | X       |
| CF                                  | m   | 12        | 24       | Veh.   | X  | X      | X                 | X    | X       | CF                                  | m   | 16        | 28       | PP-011 | X  | X      | X                 | X    | X       |
| CF                                  | f   | 16        | 24       | Veh.   | X  | X      | X                 | X    | X       | CF                                  | m   | 20        | 29       | PP-012 | X  | X      | X                 | X    | X       |
| Number                              |     |           |          |        | 13 | 13     | 8                 | 11   | 9       | Number                              |     |           |          |        | 8  | 13     | 9                 | 7    | 8       |
|                                     |     |           |          |        |    |        |                   |      |         |                                     |     |           |          |        |    |        |                   |      |         |
|                                     |     |           |          |        |    |        |                   |      |         | CF                                  | f   | 12        | 48       | PP-007 | X  | X      | X                 |      |         |
| CF                                  | f   | 12        | 48       | Vhe.   | X  | X      | X                 | X    | X       | CF                                  | f   | 12        | 48       | PP-007 | X  | X      | X                 | X    | X       |
| CF                                  | f   | 14        | 48       | Vhe.   | X  | X      | X                 | X    | X       | CF                                  | f   | 12        | 48       | PP-007 | X  | X      | X                 | X    | X       |
| CF                                  | f   | 14        | 48       | Vhe.   | X  | X      | X                 | X    | X       | CF                                  | f   | 16        | 48       | PP-007 | X  | X      | X                 | X    | X       |
| CF                                  | f   | 14        | 48       | Vhe.   | X  | X      | X                 | X    | X       | CF                                  | f   | 20        | 48       | PP-007 | X  | X      | X                 | X    | X       |
| CF                                  | f   | 14        | 48       | Vhe.   | X  | X      | X                 | X    | X       | CF                                  | f   | 12        | 48       | PP-007 | X  | X      | X                 | X    | X       |
| CF                                  | m   | 14        | 48       | Vhe.   | X  | X      | X                 | X    | X       | CF                                  | m   | 12        | 48       | PP-007 | X  | X      | X                 | X    | X       |
| Number                              |     |           |          |        | 5  | 5      | 5                 | 5    | 5       | Number                              |     |           |          |        | 7  | 7      | 5                 | 5    | 5       |

**Fig.1a**

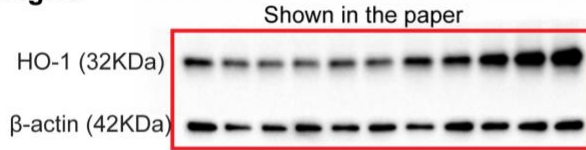

**Fig.1g (left)**

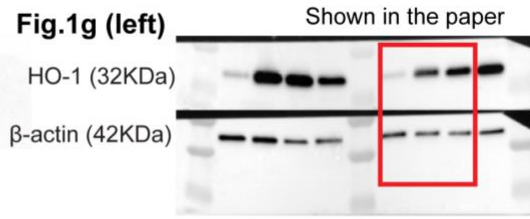

**Fig.1g (right)**

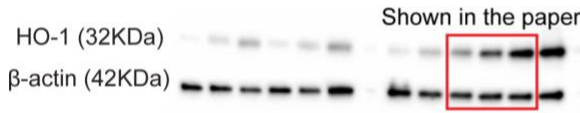

**Fig.2a**

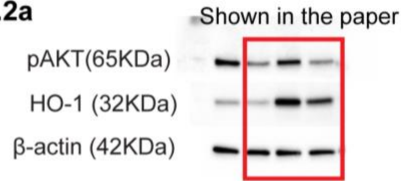

**Fig.2d**

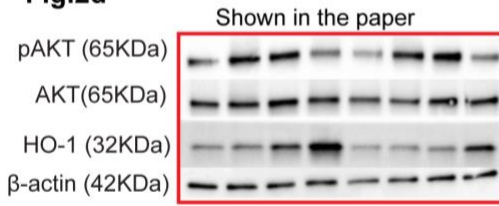

**Fig.2e**

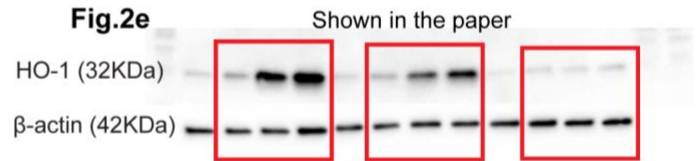

**Fig.3a (left)**

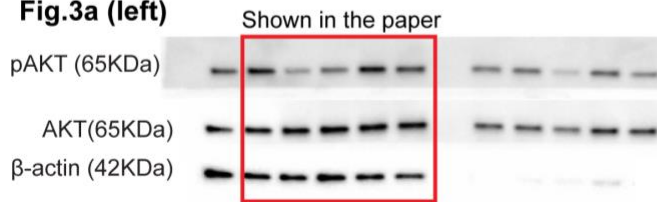

**Fig.3b (left)**

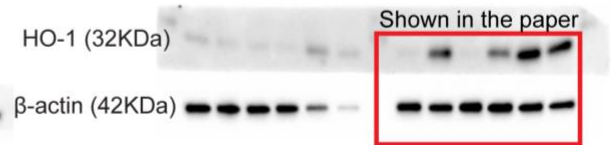

**Fig.3a (right)**

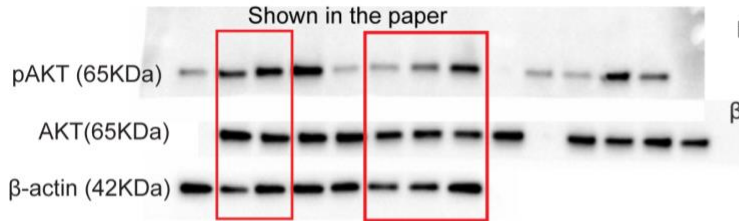

**Fig.3b (right)**

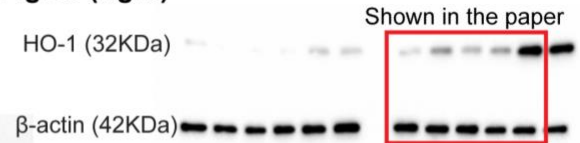

**Sup Fig 1a**

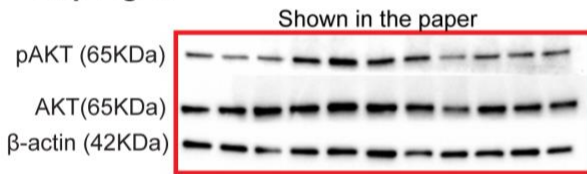

**Sup Fig 1c**

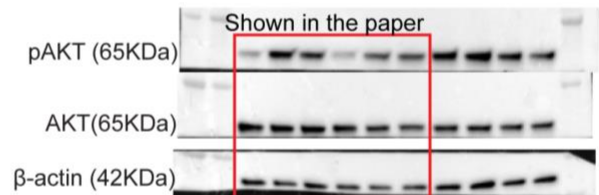

**Sup Fig 1d**

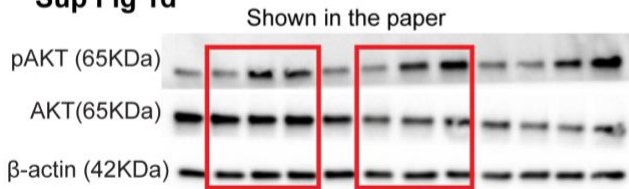

**Sup Fig 3b**

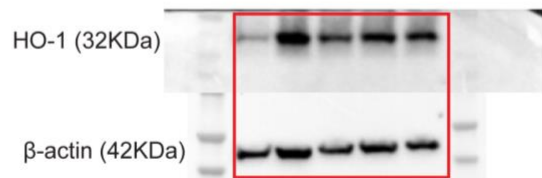

Supplement: 12276_2022_770_MOESM1_ESM.pdf [file 12276_2022_770_MOESM1_ESM.pdf]
